# Supplementary material for: Multimodal molecular landscape of response to Y90-resin microsphere radioembolization followed by nivolumab for advanced hepatocellular carcinoma
Source: HighWire-hosted journal article supplement (doi:10.1136/jitc-2023-007106), 2023-08-01
Supplement: jitc-2023-007106supp002_data_supplement.xlsx [file jitc-2023-007106supp002_data_supplement.xlsx]

## Sheet: TableS1
Supplementary Table 1: List of all differentially expressed genes between R and NR (pre-treatment)
Gene	baseMean	log2FoldChange	lfcSE	stat	pvalue	padj
MAGEA4	15.624	-23.0509	2.60847	-8.83695	9.83639e-19	1.5513e-14
TFDP3	10.7553	-22.4646	3.01864	-7.44195	9.92069e-14	7.82296e-10
CST1	2265.19	9.18525	1.27781	7.18825	6.56255e-13	3.44993e-09
FBXO32	400.686	3.37552	0.54585	6.18397	6.25084e-10	2.46455e-06
RASGRF1	37.4408	5.16769	0.889837	5.80746	6.34285e-09	2.00066e-05
ACTG2	376.442	2.91312	0.512471	5.68445	1.31231e-08	3.11036e-05
ATF5	640.882	-2.88299	0.507946	-5.67578	1.38054e-08	3.11036e-05
PTGS1	418.995	3.1155	0.569622	5.46942	4.51515e-08	8.90106e-05
SLC30A2	123.603	6.1615	1.14467	5.38278	7.33422e-08	0.00012852
SLC2A3	260.81	2.92192	0.547135	5.34041	9.27391e-08	0.000146259
GPNMB	2553.03	2.80551	0.529583	5.29758	1.17348e-07	0.000168245
OLFML2B	156.546	1.99	0.381432	5.21717	1.81674e-07	0.000238765
DNAH10	34.8563	4.10025	0.788925	5.19726	2.02253e-07	0.000245269
IFNGR1	1805.81	1.46466	0.282567	5.1834	2.17876e-07	0.000245269
SCUBE2	113.687	4.16635	0.805768	5.17065	2.33279e-07	0.000245269
NTS	479.695	-6.61311	1.284	-5.15041	2.59917e-07	0.000256197
SULF1	668.996	3.37078	0.669767	5.03276	4.83471e-07	0.000448519
ARID3A	73.1893	-2.57822	0.516096	-4.99561	5.86508e-07	0.000496345
MYO1A	34.9271	-4.04423	0.810163	-4.99187	5.97968e-07	0.000496345
TREM1	13.1513	3.64923	0.73274	4.98025	6.35008e-07	0.000500736
ADAMTS14	40.2957	3.59975	0.725952	4.95867	7.09787e-07	0.00053305
GPIHBP1	19.0798	-2.65051	0.538965	-4.91777	8.75338e-07	0.000627498
SERTAD2	157.997	-1.10498	0.22534	-4.90362	9.40852e-07	0.000645138
KCNK9	15.6751	4.27971	0.883003	4.84677	1.25488e-06	0.000824612
MTMR7	54.9272	-4.08403	0.845695	-4.8292	1.37082e-06	0.00086477
AKR1B1	960.444	2.35109	0.49042	4.79402	1.63471e-06	0.000889
IGF2	3564.6	-4.48595	0.933699	-4.8045	1.55141e-06	0.000889
POSTN	1148.66	3.58293	0.746618	4.79888	1.59559e-06	0.000889
COL1A2	11255.5	2.78886	0.587865	4.74404	2.09499e-06	0.000944003
COLEC12	28.8348	2.63624	0.554275	4.7562	1.97273e-06	0.000944003
ME1	710.634	2.04117	0.428638	4.76198	1.917e-06	0.000944003
MSC	464.635	3.46143	0.728947	4.74854	2.04891e-06	0.000944003
RP11-383H13.1	76.2677	3.0917	0.651642	4.74447	2.09048e-06	0.000944003
RPS4X	2680.51	-1.24328	0.261384	-4.75652	1.96962e-06	0.000944003
SULT1C4	47.1688	-3.12413	0.661548	-4.72245	2.33017e-06	0.00102081
DUSP9	179.011	-3.65263	0.774994	-4.71311	2.43969e-06	0.0010399
KCNJ5	93.8786	2.95372	0.631649	4.6762	2.92243e-06	0.00121289
CCDC81	4.83809	3.14109	0.683517	4.59548	4.31757e-06	0.00174596
FIGN	84.7124	-1.88774	0.412529	-4.57603	4.73873e-06	0.00177939
KIAA1199	116.687	3.56177	0.777405	4.58161	4.61409e-06	0.00177939
ATL1	69.0293	2.59838	0.568482	4.57074	4.85999e-06	0.00178249
RGS16	210.471	2.15104	0.472683	4.55069	5.34691e-06	0.00186441
WDFY2	128.672	1.228	0.269677	4.55361	5.27343e-06	0.00186441
MT-ATP8	1132.93	-3.0783	0.677697	-4.54229	5.56451e-06	0.00186719
PLAU	326.917	1.823	0.405006	4.50115	6.75856e-06	0.00222061
DYNC1I1	152.55	3.19318	0.710953	4.4914	7.07552e-06	0.00225072
FAM83A	9.68431	5.63024	1.25406	4.4896	7.13563e-06	0.00225072
ADCY1	176.612	-2.79955	0.626692	-4.46718	7.92556e-06	0.00244892
CD300LG	15.7335	-3.9252	0.881438	-4.45318	8.46084e-06	0.00244892
LAIR1	192.359	1.66162	0.373625	4.4473	8.69569e-06	0.00244892
MROH1	104.076	1.32863	0.298733	4.44755	8.6854e-06	0.00244892
PLAUR	208.023	1.97205	0.443257	4.44899	8.62748e-06	0.00244892
USP51	15.9306	-2.22573	0.500287	-4.4489	8.63112e-06	0.00244892
DKK3	639.332	1.96071	0.442686	4.42913	9.4614e-06	0.00261782
ACTN2	147.141	-4.09826	0.926258	-4.42454	9.66495e-06	0.00262803
RCAN2	275.098	2.50222	0.566421	4.41761	9.98006e-06	0.00266772
NDRG4	98.2258	3.68245	0.836232	4.40362	1.06459e-05	0.00279826
GPC5	38.8023	-4.35653	0.997154	-4.36896	1.24839e-05	0.00322761
ACTA2	6337.78	1.99144	0.458045	4.34769	1.37576e-05	0.00349953
REP15	15.5263	-2.53312	0.583298	-4.34275	1.40707e-05	0.00352237
HLA-DMA	1153.31	1.66606	0.384206	4.33636	1.4486e-05	0.00356966
IL1RAP	440.94	-1.65943	0.383142	-4.33112	1.48355e-05	0.00359956
GXYLT2	56.943	2.58187	0.598814	4.31163	1.62053e-05	0.00375845
PTGER3	13.0392	2.45201	0.568286	4.31474	1.59794e-05	0.00375845
TPBG	240.27	3.27398	0.758324	4.31739	1.57887e-05	0.00375845
CHODL	143.509	-7.00488	1.62955	-4.29867	1.71826e-05	0.00387125
CCL14	139.341	-2.29869	0.53696	-4.28093	1.86115e-05	0.0040767
COL23A1	36.5085	3.43697	0.805706	4.26579	1.99198e-05	0.00424535
FCGR2A	300.002	1.57184	0.368311	4.2677	1.97502e-05	0.00424535
CPT1C	106.674	2.8662	0.672418	4.26253	2.02128e-05	0.00425035
GPR137B	276.744	1.90462	0.44811	4.25033	2.13457e-05	0.00442952
MEP1A	178.419	-5.35927	1.26295	-4.24344	2.20114e-05	0.00450834
FOXA3	357.833	-1.67829	0.400391	-4.19162	2.76967e-05	0.00544243
KCNE4	69.5758	2.84373	0.677559	4.19702	2.70447e-05	0.00544243
DOT1L	111.944	-1.13863	0.272045	-4.18546	2.84588e-05	0.00547346
H2AFY2	179.047	-2.04756	0.489574	-4.18233	2.8854e-05	0.0054826
APCDD1L	6.06824	5.83107	1.39939	4.16685	3.08832e-05	0.00560981
COL1A1	13605.3	2.62445	0.629911	4.16639	3.09463e-05	0.00560981
SYDE2	45.5732	-1.91281	0.458963	-4.16769	3.07706e-05	0.00560981
CDH11	214.308	2.60494	0.626874	4.15544	3.24668e-05	0.00581857
RPS6	4990.2	-1.04012	0.251626	-4.13361	3.57111e-05	0.00632809
FLCN	132.529	-1.34153	0.324802	-4.1303	3.62283e-05	0.0063484
KMT2D	111.56	-1.55814	0.378784	-4.11353	3.89659e-05	0.00669481
PFKP	237.587	1.84184	0.44781	4.11301	3.90541e-05	0.00669481
COL3A1	13366.5	2.4689	0.601575	4.10406	4.05968e-05	0.00681119
SLC11A1	67.8685	2.36643	0.577953	4.0945	4.23087e-05	0.00702368
SPP1	15387	2.37962	0.582851	4.08272	4.45113e-05	0.00731238
TMC1	4.59315	5.39567	1.3241	4.07496	4.60217e-05	0.00748256
OLR1	48.6858	3.36014	0.825365	4.0711	4.6792e-05	0.00753017
RGAG1	14.0893	-4.95609	1.2209	-4.05937	4.92049e-05	0.00783849
STC2	81.3676	2.50562	0.621783	4.02974	5.5839e-05	0.00880637
LYN	533.107	1.00313	0.250293	4.00784	6.12761e-05	0.00947437
C8orf44-SGK3	4.95571	-5.17333	1.29586	-3.9922	6.54643e-05	0.00997685
CXXC4	17.1208	-1.74939	0.438332	-3.99101	6.57912e-05	0.00997685
TCN1	8.82308	4.9741	1.24729	3.98792	6.66565e-05	0.0100118
TDRD9	28.4525	4.44659	1.11633	3.98323	6.79852e-05	0.010115
TBX4	9.22984	4.95172	1.24545	3.97584	7.01326e-05	0.0101473
IPO7	425.835	-1.41809	0.357229	-3.96968	7.19695e-05	0.0103185
ITGA11	89.7117	2.27911	0.577834	3.94423	8.00574e-05	0.0113746
ARL4A	1128.89	2.14013	0.543816	3.93539	8.30605e-05	0.0116203
CD44	584.498	1.70363	0.432964	3.93482	8.32599e-05	0.0116203
CACNA1I	3.93612	4.71893	1.20425	3.91856	8.90795e-05	0.011721
FABP4	318.726	-2.53556	0.645556	-3.92771	8.57577e-05	0.011721
FCGR1A	111.653	2.26835	0.578266	3.92267	8.75732e-05	0.011721
GSTM1	487.656	-6.1666	1.57311	-3.92	8.85503e-05	0.011721
MMP2	891.712	2.28485	0.583127	3.91828	8.91839e-05	0.011721
ZFR2	10.6976	5.35438	1.36495	3.92278	8.75337e-05	0.011721
FGFR3	478.527	-1.66689	0.425948	-3.91336	9.102e-05	0.0118634
ABCG4	2.83469	3.65991	0.935733	3.91128	9.18091e-05	0.0118682
GAL3ST4	46.5733	2.25473	0.577382	3.9051	9.41872e-05	0.0120766
ATP10A	67.745	2.97413	0.763137	3.89725	9.72929e-05	0.0123742
NPL	690.37	1.43144	0.367595	3.89408	9.85735e-05	0.0124368
FPR1	65.2619	1.90398	0.489963	3.88597	0.000101921	0.0127571
FST	1577.35	1.59183	0.410039	3.88213	0.000103544	0.0127798
SYT15	16.2466	-2.28179	0.58783	-3.88171	0.000103723	0.0127798
CD84	147.155	1.49951	0.387613	3.86859	0.000109466	0.0132085
CTSK	388.637	2.143	0.553935	3.86869	0.000109424	0.0132085
INHBE	309.566	-2.30436	0.595858	-3.86729	0.000110051	0.0132085
WNK4	26.0547	-3.96588	1.02579	-3.86618	0.000110552	0.0132085
RPL28	643.561	-1.70025	0.440511	-3.85971	0.00011352	0.0134611
PLXDC1	151.292	1.94245	0.504032	3.85382	0.000116287	0.0136863
CNN1	132.253	2.13144	0.553495	3.85088	0.000117692	0.0137119
COL8A2	69.1431	2.92823	0.76063	3.84974	0.000118244	0.0137119
C6orf48	352.654	-1.1133	0.290246	-3.8357	0.000125209	0.0141048
DRP2	3.27607	4.65644	1.21299	3.8388	0.000123639	0.0141048
PCBP2	1029.03	-1.2662	0.330026	-3.83666	0.00012472	0.0141048
SCPEP1	1358.64	1.44727	0.377162	3.83728	0.000124406	0.0141048
ATP8B3	33.3983	2.32807	0.609708	3.81833	0.000134357	0.0148178
TMEM30B	188.524	-1.32514	0.346966	-3.81922	0.000133875	0.0148178
PRRG4	150.161	-1.71878	0.450576	-3.81462	0.000136393	0.0149378
FBN1	537.938	1.96594	0.515658	3.81248	0.00013758	0.014964
CLSTN2	116.861	3.2698	0.85989	3.80258	0.000143199	0.0154684
OVGP1	82.3231	-1.44199	0.380133	-3.79337	0.000148614	0.0157443
RPL36A	797.813	-1.3304	0.350737	-3.79315	0.000148748	0.0157443
TMEM255A	18.109	3.05207	0.806279	3.78538	0.000153475	0.0161364
RPL12	1298.41	-1.71601	0.453523	-3.78372	0.000154501	0.0161367
FAM83G	273.599	-1.36756	0.362295	-3.77472	0.000160187	0.0164691
PTK7	153.682	2.48829	0.65894	3.77621	0.000159235	0.0164691
RAB12	59.2944	-2.30571	0.610987	-3.77374	0.000160816	0.0164691
OCA2	14.6584	-3.9417	1.04551	-3.77011	0.000163174	0.0166027
EIF4B	1403.56	-1.00543	0.267507	-3.75851	0.000170928	0.0170614
N4BP2	173.395	-1.15729	0.307905	-3.7586	0.000170865	0.0170614
PRSS23	1448.76	1.98907	0.529135	3.75909	0.000170532	0.0170614
DMKN	81.7517	-3.57074	0.950565	-3.75644	0.000172344	0.0170946
ME3	73.4617	1.32977	0.354389	3.75228	0.000175233	0.0171845
ALX3	22.3642	3.05637	0.816593	3.74283	0.000181962	0.017628
C5AR1	46.8017	1.69197	0.452096	3.74251	0.000182193	0.017628
THSD1	162.494	1.62279	0.433894	3.74005	0.000183983	0.0176898
CCL18	131.05	2.18373	0.585334	3.73074	0.000190919	0.0178164
CHN1	80.5214	1.83848	0.492689	3.73152	0.000190328	0.0178164
NOS1AP	84.6737	-1.47594	0.395347	-3.73326	0.000189015	0.0178164
SMO	324.058	-1.11984	0.300049	-3.73219	0.000189819	0.0178164
CCL11	19.4732	3.19608	0.857486	3.72727	0.000193564	0.0179296
ERH	236.943	-1.45155	0.389707	-3.72471	0.000195542	0.0179296
NLGN4X	41.9682	-2.65111	0.711666	-3.72522	0.000195147	0.0179296
EP400	142.311	-1.01149	0.272159	-3.71653	0.000201979	0.0180613
SIX4	10.0082	-3.22528	0.867941	-3.71602	0.000202389	0.0180613
THBS1	1441.17	1.97731	0.531785	3.71824	0.000200614	0.0180613
TNFAIP6	25.3263	2.59899	0.699478	3.71562	0.000202704	0.0180613
C1orf233	58.4068	1.95804	0.527437	3.71237	0.000205327	0.0181922
RPL13A	4234.96	-1.43879	0.387999	-3.70823	0.000208712	0.0183888
BIRC7	6.40973	3.65721	0.98721	3.7046	0.000211726	0.0185508
SCNN1A	148.435	2.49994	0.675979	3.69826	0.000217087	0.0188491
SYT7	410.535	-2.47898	0.670844	-3.69531	0.000219616	0.0188522
RP11-169F17.1	50.6516	-6.37107	1.72512	-3.69312	0.000221518	0.0188841
KCNK10	6.38777	-5.81752	1.57954	-3.68304	0.000230465	0.0195412
RPL37	1391.14	-1.68771	0.459847	-3.67016	0.000242394	0.0203341
FGFR4	1580.9	-1.14875	0.313346	-3.66606	0.000246317	0.0205538
DNAJC22	329.41	-1.0871	0.296849	-3.66213	0.00025013	0.0207621
ROBO3	51.4501	2.01282	0.550644	3.65539	0.00025679	0.0212033
IFI30	4641.06	1.0561	0.289128	3.65272	0.000259479	0.0213137
RPS16	1573.28	-1.12288	0.308682	-3.63767	0.000275121	0.0223656
SEMA4G	216.297	-1.41837	0.390387	-3.63323	0.000279899	0.0225219
TWSG1	275.074	1.61199	0.443565	3.63417	0.000278872	0.0225219
RPS9	2028.84	-1.27693	0.352896	-3.61841	0.000296415	0.0237298
MS4A4A	310.015	1.4589	0.404497	3.6067	0.000310114	0.0247011
PAQR8	219.867	2.313	0.642111	3.60218	0.000315555	0.0248227
WNT11	61.8294	2.58289	0.717115	3.60178	0.000316051	0.0248227
DSCR8	15.2543	-8.13641	2.26251	-3.59619	0.000322917	0.0250873
HCN3	231.099	-1.80151	0.501211	-3.59431	0.000325247	0.0251445
DQX1	37.2071	-4.46281	1.24316	-3.58989	0.000330813	0.0253265
EDIL3	108.191	1.79767	0.50067	3.59052	0.000330019	0.0253265
KMT2B	28.5926	-1.69149	0.471985	-3.58378	0.00033866	0.0255803
NCF2	159.442	1.3473	0.375928	3.58394	0.000338452	0.0255803
PRR7	79.2361	1.74328	0.48647	3.58352	0.000338995	0.0255803
RPL14	1064.38	-1.10038	0.307688	-3.57629	0.000348501	0.0260484
CYP2U1	109.788	1.15541	0.32366	3.56982	0.00035723	0.0265749
TNFRSF19	348.817	2.89911	0.814326	3.56014	0.000370662	0.0273164
C1orf226	154.412	-1.23583	0.347915	-3.5521	0.000382162	0.0280329
C1orf127	4.83069	2.69631	0.760189	3.5469	0.000389797	0.0282866
DCSTAMP	6.88498	2.54368	0.71732	3.54608	0.000391001	0.0282866
RPS18	6310.74	-1.50922	0.426578	-3.53798	0.000403196	0.0289037
AUTS2	142.584	-1.48811	0.420988	-3.5348	0.000408078	0.0291213
QPCT	272.882	2.30424	0.652761	3.52999	0.000415574	0.0293902
DTX1	142.503	-2.1676	0.615851	-3.51967	0.00043208	0.0303186
HRASLS2	10.2746	-4.26919	1.21341	-3.51833	0.000434266	0.0303186
MPPED2	16.6506	1.75138	0.498004	3.51679	0.000436793	0.0303465
BAG6	802.098	-1.15779	0.329654	-3.51216	0.000444487	0.0307456
SCAI	37.4519	-1.27926	0.36455	-3.50915	0.000449543	0.0309595
SERPINA5	5013	-1.40089	0.399344	-3.50797	0.000451532	0.0309613
RAPGEFL1	39.6471	-1.82067	0.519398	-3.50535	0.000456014	0.0309991
CDK19	53.2546	-1.19116	0.340219	-3.50115	0.000463249	0.0313558
CAB39L	88.5007	1.79782	0.514483	3.49442	0.000475097	0.0318841
GNB4	76.0566	1.51441	0.433366	3.49453	0.000474895	0.0318841
THY1	1232.35	1.29448	0.37081	3.49095	0.000481302	0.0321636
RPL23	1385.47	-1.37592	0.394268	-3.4898	0.000483376	0.0321659
FRZB	509.928	2.37715	0.682639	3.4823	0.000497128	0.032532
DKK1	174.644	-3.92464	1.12805	-3.47913	0.000503051	0.0327835
LRRC15	15.815	4.30236	1.24295	3.46141	0.000537346	0.0345897
KCNJ15	53.4406	-2.17879	0.630252	-3.45702	0.000546186	0.0348741
DNAJB2	212.928	-1.15063	0.333046	-3.45488	0.000550544	0.0348765
PDCD1LG2	24.6197	1.75164	0.507012	3.45483	0.000550646	0.0348765
LSM11	39.4568	-1.10127	0.319004	-3.45223	0.00055598	0.034883
MAEL	72.3497	-3.11358	0.901732	-3.45288	0.000554627	0.034883
RPL6	2248.24	-1.01317	0.293833	-3.44813	0.000564486	0.0351878
CTDSP1	449.872	-1.02009	0.296031	-3.44588	0.000569206	0.0353423
HAVCR2	114.531	1.35599	0.394001	3.44158	0.000578331	0.035768
ERF	74.7867	-1.37237	0.399916	-3.43165	0.000599923	0.0366721
RPL37A	1451.33	-1.37112	0.399936	-3.42834	0.00060729	0.0369791
TRPA1	8.10999	3.26129	0.951919	3.42601	0.000612513	0.0371536
ATG2B	197.844	-1.03896	0.303878	-3.41901	0.000628485	0.0372907
FAP	122.321	2.27016	0.664021	3.41881	0.00062896	0.0372907
KIF13B	153.588	-1.42916	0.4176	-3.42231	0.000620918	0.0372907
PILRA	93.4954	1.34716	0.393919	3.41988	0.000626481	0.0372907
CBR3	87.4928	1.36229	0.399079	3.41358	0.000641163	0.0373118
DNAH8	9.72535	-4.13904	1.212	-3.41504	0.000637729	0.0373118
MMACHC	62.506	-1.58942	0.465481	-3.41457	0.000638828	0.0373118
NTM	111.923	3.03503	0.888809	3.41471	0.000638496	0.0373118
SPARC	16885.8	1.28895	0.377926	3.41058	0.000648242	0.0373118
TM6SF1	58.6379	1.46347	0.428963	3.41164	0.000645731	0.0373118
GLT8D2	61.5529	1.89567	0.556211	3.40818	0.000653966	0.0373948
NOTCH3	509.606	1.40397	0.411964	3.40799	0.000654427	0.0373948
PFKFB2	196.526	1.73766	0.510144	3.40621	0.000658706	0.0375034
COL11A1	93.0541	3.82156	1.12231	3.40509	0.000661422	0.0375226
IL11RA	279.032	-1.08409	0.318621	-3.40244	0.000667873	0.0377528
FZD5	694.065	-1.23418	0.363694	-3.39345	0.000690184	0.0388746
SLCO4C1	59.7752	-3.48982	1.03194	-3.38181	0.000720099	0.0404152
PDPN	39.8721	3.41565	1.01037	3.38058	0.00072332	0.0404521
SERPINF2	10333.7	-1.18385	0.350294	-3.37958	0.00072597	0.0404568
TRIM10	30.3536	-1.98156	0.586616	-3.37796	0.000730254	0.0405522
CPN1	825.567	-1.74774	0.518495	-3.37079	0.000749537	0.041332
SETD1B	68.7527	-1.14771	0.340606	-3.3696	0.000752778	0.0413661
NEB	213.099	-2.61687	0.776881	-3.36843	0.00075598	0.0413978
C2CD4A	21.9065	2.51527	0.747179	3.36635	0.000761691	0.0415662
TMEM63C	11.1166	4.08203	1.21307	3.36503	0.00076535	0.0416218
CTD-2228K2.5	202.456	1.00452	0.298633	3.36373	0.000768975	0.0416589
KLF5	120.128	-2.31121	0.687824	-3.36018	0.000778905	0.0416589
CDH16	18.0762	3.81331	1.13527	3.35896	0.000782376	0.0416853
TNFRSF18	41.3379	2.25371	0.671472	3.35638	0.00078971	0.0417937
PTMS	977.735	-1.33308	0.397558	-3.35318	0.000798889	0.0421381
OR51E1	30.3805	1.72059	0.513549	3.35038	0.000807	0.0423818
CARD14	12.0023	2.15367	0.64345	3.34706	0.000816729	0.0424292
LRRC25	107.738	1.3425	0.401004	3.34785	0.000814409	0.0424292
ARHGAP22	28.6023	1.62733	0.486917	3.34211	0.000831446	0.0429926
FABP3	93.7032	2.0208	0.605588	3.33692	0.000847119	0.0436147
WDR72	296.928	-2.03992	0.612412	-3.33096	0.000865484	0.0440006
MROH2B	8.97231	-3.98408	1.19679	-3.32897	0.000871693	0.0440056
RPL39	1157.71	-1.61076	0.48394	-3.32843	0.00087336	0.0440056
AXIN2	186.229	2.10933	0.634596	3.3239	0.000887672	0.0443021
RPS11	2185.42	-1.3229	0.397965	-3.32417	0.000886818	0.0443021
BRPF3	286.794	-1.11455	0.335668	-3.32039	0.000898911	0.0444412
HSPB8	307.525	2.01727	0.607468	3.32079	0.000897642	0.0444412
LGALS12	6.83924	4.32654	1.30384	3.31831	0.000905625	0.0446332
BAALC	182.358	2.33365	0.703585	3.3168	0.000910539	0.0447356
HSPA12A	42.1276	1.28903	0.389179	3.31218	0.000925722	0.0453386
IHH	32.2901	-2.23962	0.676352	-3.31132	0.000928562	0.0453386
MT-ND3	2292.16	-2.32802	0.703389	-3.30971	0.000933912	0.045459
XIAP	237.759	-1.01584	0.307191	-3.30686	0.000943466	0.0457828
F2RL2	15.6062	2.35044	0.7121	3.30072	0.000964384	0.0465116
TM4SF19	10.3186	2.78	0.842821	3.29845	0.000972208	0.046746
C3AR1	236.289	1.46017	0.443178	3.29477	0.000985036	0.0470864
SLC16A3	118.759	1.82806	0.555408	3.29137	0.000996993	0.0475033
CCDC80	390.809	2.05813	0.626838	3.28335	0.00102583	0.0481497
HOXA2	7.60125	3.90458	1.1889	3.28418	0.00102278	0.0481497
KIF17	32.8029	-1.67835	0.511017	-3.28432	0.00102227	0.0481497
PRRC2A	179.695	-1.23914	0.377948	-3.27859	0.00104326	0.0488227
TLR7	27.6505	1.70291	0.519769	3.27628	0.00105184	0.0490785
MT-ND4L	6953.74	-2.00682	0.613401	-3.27163	0.00106929	0.0493094
RPS12	1058.27	-1.29333	0.395511	-3.27001	0.00107542	0.0494474
C1orf173	2.46456	-3.55077	1.08761	-3.26474	0.00109563	0.0496528
PHLPP1	195.783	-1.33973	0.410271	-3.26548	0.00109279	0.0496528
RPS27	1759.04	-1.42434	0.436236	-3.26507	0.00109438	0.0496528
VCAN	652.281	2.25265	0.689597	3.26663	0.00108838	0.0496528

## Sheet: TableS2
Supplementary Table 2. Gene signatures for HCC subtypes from Kaya et al. 2022
KAYA_P1_UP	KAYA_P2_UP	KAYA_M1_UP	KAYA_M2_UP
ITGA3	DUSP9	CCL25	C1QTNF3
ITIH5	IGSF1	HMCN2	VEGFD
SPEG	ARID3A	CYP2A7	GLUL
DPYSL3	MTMR7	FNDC5	MYH7B
CDR2L	EPO	SLC22A1	AQP6
KIF3C	HIC2	CYP2A13	FBXO31
CTBP2	CYP19A1	ACACB	ASPSCR1
GPX8	AFP	MRC1	CA5B
PMEPA1	GDPD3	SPRYD4	2004-09-01
MYOF	ACVR2B	CYP2A6	SLC22A4
SCD5	PNCK	DNAH6	IQCH
TUBB6	CD7	ADGRA3	DYNC1I1
LAMC2	TNNI2	CD1D	AMACR
MUC1	SLC1A7	GLS2	NUBPL
ADAM28	CXCL17	HSD17B13	SPARCL1
MMP14	CSF3R	SDS	ZNF385D
SCTR	RPS7	MFSD2A	ICK
MXRA5	NREP	ACO1	RGSL1
KEL	RPL9	AVPR1A	TBX3
CHST3	NAALADL1	MNS1	FRMD3
IQGAP1	HAVCR1	USP2	RASGRF1
MAP1A	PRDM15	CYP2B6	AXIN2
MECOM	LGI4	INSIG1	MERTK
PRRX1	PPARG	ALDOB	TBX4
ZNF469	BEND3	FGGY	AMER1
ADCY3	JAML	SDSL	UGGT1
TGFB3	RPSA	TUBE1	RHBDL3
TMEM130	C19orf48	PRODH	CPPED1
SLC35F2	FLVCR1	TTPAL	TSPAN5
PGM2L1	NR6A1	KDM8	PRR5L
ANXA3	RPS5	MTHFS	TEC
TSHZ3	HDAC11	GASK1A	ABHD1
MEIS3	PIGZ	CYP4V2	TSC22D1
COL6A3	RPL28	SLC41A2	ANKRD37
KIRREL1	GLUD2	TCEA2	PANX1
NTRK2	NDRG1	FBP1	GLT8D1
MMP2	PAQR9	GHR	SLC5A6
ANTXR1	RPS19	DHRS1	HIBADH
CERCAM	RPL32	ACMSD	STRIP1
LRRK1	SFI1	XDH	FAM8A1
FLNA	BMF	GCK	LAMA3
TPM4	RPL18	ETNPPL	MYH3
PDGFD	RPS24	SOCS2	RASL10B
PTPRE	PDE9A	APBA1	PRKN
XYLT1	VSIG1	TTR	TMCC1
STON1	OVGP1	ANO1	CST1
ADAMTS12	MYCN	BMERB1	ZNF503
VTCN1	SKP2	GCH1	CCDC170
MYO10	RPL13A	LPIN2	TTC9
SLC6A6	PACSIN1	RIDA	NEK3
PMP22	RPL14	ANKRD22	SBSPON
NAV1	TTLL4	HAAO	CLDN2
ARMCX2	ARHGEF2	SHD	CAAP1
SLC9A1	H2AFX	ASS1	SP5
PLAUR	IGF2BP2	ZG16	TMEM150C
COL8A2	CDKN1C	ZNF684	FITM2
COL1A2	TRNP1	NAMPT	RNF43
SSPN	RPL36	GNE	UST
FMNL3	TNNC1	GBP7	ALDH3A1
MXRA8	SPRN	RNF152	ROCK2
FAP	PLA2G7	SRD5A1	CYB5B
EDIL3	RPL8	SLC7A2	INSIG2
HS3ST1	SCML2	GPD1	NKD1
PHLDB1	CHST13	GLYATL1	RHBG
CDH11	PNMA3	TTC39C	TBCK
IGFN1	B3GALT2	GPLD1	TCF7
JAG1	NTS	FCN3	WASHC3
ABR	FABP3	ECHDC2	SMYD2
B3GNT9	RPS12	SCP2	HABP4
P3H2	OSBP2	BBOX1	DISC1
SEL1L3	MEP1A	C1R	COL7A1
NCEH1	SSTR2	BDH2	VSTM4
FAM129B	KISS1	SYT7	CRYZ
LXN	H2AFY2	CGNL1	TUT7
TUBA1A	PEG3	EPHX2	RHOBTB1
GLI2	SSUH2	GADD45B	PREB
LGI2	TSPAN7	FXYD1	GPHN
FAM129A	PSRC1	CAT	2008-03-01
AKT3	SULT1C4	KLKB1	GNAI1
HDGFL3	GPC5	ANGPTL4	YPEL1
GAL3ST4	TMEM86B	CYFIP2	FAM169A
FHOD1	MSI1	FETUB	STARD13
CAMKK1	KCTD17	PXMP2	NOTUM
RAB31	RPL36A	SLCO2B1	ANKFN1
AMPD3	MARCKSL1	ARRDC4	CEMIP2
FZD1	PTHLH	SLC28A1	SLC13A3
TMEM159	SLC29A4	TAT	MCUR1
CTTNBP2NL	CDC25A	CRHBP	SLC12A1
PLD5	UCHL1	ACAA2	ZNF775
ORAI2	BLM	SLC43A3	HLF
PRKG1	CYP26B1	OASL	SH3GL3
PTPN13	TRIM71	CLYBL	FOXRED2
SGPP2	PLCXD1	CLTRN	LPCAT2
GALNT3	LDOC1	GSTZ1	SLC30A3
COL3A1	S100A8	SLC10A1	HSDL1
RYR1	PEG10	SLC46A3	IRS1
TMEM173	MYBL2	SLC27A2	RNLS
DSE	NPW	GCDH	CENPX
LBH	NEURL1	SLC25A15	ACSL5
VEPH1	LRRC1	UPP2	HSDL2

## Sheet: TableS3
Supplementary Table 3. List of antibodies used for flow cytometry.
#	Antigen	Fluorochrome	Clone	Manufacturer	Catalogue number
1	CD45RA	BUV395	5H9	BD Biosciences	740315
2	CD11c	BUV496	B-ly6	BD Biosciences	741139
3	CD14	BUV563	MφP9	BD Biosciences	741441
4	CXCR5	BUV615	RF8B2	BD Biosciences	751293
5	Ki-67	BUV737	B56	BD Biosciences	567130
6	CD3	BUV805	UCHT1	BD Biosciences	612896
7	CD123	Super Bright 436	6H6	Invitrogen; Thermo Fisher Scientific	62-1239-42
8	CD16	eFluor 450	CB16	Invitrogen; Thermo Fisher Scientific	48-0168-42
9	TCRgd	BV480	B1	BD Biosciences	566076
10	CD8	cFluor V547	SK1	Cytek Biosciences	R7-20064
11	CD11b	BV570	ICRF44	BioLegend	301325
12	PD-L1	BV650	29E.2A3	BioLegend	329740
13	CCR5	BV711	J418F1	BioLegend	359130
14	CXCR6	BV786	13B1E5	BD Biosciences	743602
15	CXCL9	FITC	49106	Invitrogen; Thermo Fisher Scientific	MA5-23544
16	CD4	Spark Blue 550	SK3	BioLegend	344656
17	CD45	PerCP	2D1	BioLegend	368506
18	CCR7	PerCP-Cy5.5	G043H7	BioLegend	353220
19	LIFR	PE	12D3	BD Biosciences	566384
20	CCR2	PE-Dazzle 594	K036C2	BioLegend	357222
21	PD-1	PE-Fire 640	EH12.2H7	BioLegend	329968
22	CXCR3	PE-Cy7	G025H7	BioLegend	353720
23	CD38	PE/Fire 810	S17015F	BioLegend	397225
24	CCR3	Alexa Fluor 647	500000000	BioLegend	310710
25	CD19	Spark NIR 685	HIB19	BioLegend	302270
26	CD127	APC-R700	HIL-7R-M21	BD Biosciences	565185
27	HLA-DR	APC/Fire 810	L243	BioLegend	307674

## Sheet: TableS4
Supplementary Table 4. Antibodies used for multiplex immunohistochemistry.
Primary Antibody	Company	Clone
CD8	Leica	4B11
CD38	Leica	SPC32 (38C03)
CD45	Agilent-Dako	2B11 + PD7/26
CD68	Agilent-Dako	PG-M1
CXCR3	R&D Systems	#49801
CXCL9	Invitrogen	11H1L14
LAG-3	Cell Signaling Technology	D2G40
PD-1	Cell Marque	NAT105
PD-L1	Cell Signaling Technology	E1L3N
STAT1	Cell Signaling Technology	D1K9Y

## Sheet: TableS5
Supplementary Table 5. The list of targets for Luminex panel
Target	Category
G-CSF (CSF-3)	Cytokine
GM-CSF	Cytokine
IFN alpha	Cytokine
IFN gamma	Cytokine
IL-1 alpha	Cytokine
IL-1 beta	Cytokine
IL-2	Cytokine
IL-3	Cytokine
IL-4	Cytokine
IL-5	Cytokine
IL-6	Cytokine
IL-7	Cytokine
IL-8 (CXCL8)	Cytokine
IL-9	Cytokine
IL-10	Cytokine
IL-12p70	Cytokine
IL-13	Cytokine
IL-15	Cytokine
IL-16	Cytokine
IL-17A (CTLA-8)	Cytokine
IL-18	Cytokine
IL-20	Cytokine
IL-21	Cytokine
IL-22	Cytokine
IL-23	Cytokine
IL-27	Cytokine
IL-31	Cytokine
LIF	Cytokine
M-CSF	Cytokine
MIF	Cytokine
TNF alpha	Cytokine
TNF beta	Cytokine
TSLP	Cytokine
FGF-2	Growth factors/regulators
HGF	Growth factors/regulators
MMP-1	Growth factors/regulators
NGF beta	Growth factors/regulators
SCF	Growth factors/regulators
VEGF-A	Growth factors/regulators
BLC (CXCL13)	Chemokines
ENA-78 (CXCL5)	Chemokines
Eotaxin (CCL11)	Chemokines
Eotaxin-2 (CCL24)	Chemokines
Eotaxin-3 (CCL26)	Chemokines
Fractalkine (CX3CL1)	Chemokines
Gro-alpha (CXCL1)	Chemokines
IP-10 (CXCL10)	Chemokines
I-TAC (CXCL11)	Chemokines
MCP-1 (CCL2)	Chemokines
MCP-2 (CCL8)	Chemokines
MCP-3 (CCL7)	Chemokines
MDC (CCL22)	Chemokines
MIG (CXCL9)	Chemokines
MIP-1 alpha (CCL3)	Chemokines
MIP-1 beta (CCL4)	Chemokines
MIP-3 alpha (CCL20)	Chemokines
SDF-1 alpha (CXCL12)	Chemokines
APRIL	Soluble receptors
BAFF	Soluble receptors
CD30	Soluble receptors
CD40L (CD154)	Soluble receptors
IL-2R (CD25)	Soluble receptors
TNF-RII	Soluble receptors
TRAIL (CD253)	Soluble receptors
TWEAK	Soluble receptors
